# Supplementary material
Source: ML conference proceedings conference paper supplement (https://proceedings.neurips.cc/paper_files/paper/2020/hash/92049debbe566ca5782a3045cf300a3c-Abstract.html)
Supplement: Supplementary file [file 92049debbe566ca5782a3045cf300a3c-Supplemental.pdf]

## Appendix A: Notation

| Example                                           | Description                 |
|---------------------------------------------------|-----------------------------|
| $z$                                               | Scalar                      |
| $\mathbf{z}$                                      | Vector                      |
| $Z$                                               | Continuous random variable  |
| $K$                                               | Discrete random variable    |
| $\mathbf{Z}$                                      | Continuous random vector    |
| $p(\mathbf{z})$                                   | Continuous PDF              |
| $P(k)$                                            | Discrete PMF                |
| $H[K]$                                            | Discrete entropy            |
| $h[Z]$                                            | Differential entropy        |
| $\mathbb{E}[Z]$                                   | Expectation                 |
| $D_{\text{KL}}[q_{\mathbf{Z}} \  p_{\mathbf{Z}}]$ | Kullback-Leibler divergence |
| $D_{\text{TV}}[q, p]$                             | Total variation distance    |

## Appendix B: Computational complexity of reverse channel coding

Existing algorithms for lossy compression without quantization communicate a sample by simulating a large number of random variables  $Z_n \sim p$  and then identifying an index  $N^*$  such that  $Z_{N^*}$  is distributed according to  $q$ , at least approximately in a total variation sense [e.g., 3, 4]. Here we show that no polynomial time algorithm exists which achieves this, assuming  $RP \neq NP$ , where  $RP$  is the class of randomized polynomial time algorithms.

Our result depends on the results of Long and Servedio [6, Theorem 13], who showed that simulating *restricted Boltzmann machines* (RBMs) [8] approximately is computationally hard. For completeness, we repeat it in slightly weakened but simpler form here:

**Theorem 1.** *If  $RP \neq NP$ , then there is no polynomial-time algorithm with the following property: Given as input  $\theta = (\mathbf{A}, \mathbf{a}, \mathbf{b})$  such that  $\mathbf{A}$  is an  $M \times M$  matrix, the algorithm outputs an efficiently evaluable representation of a distribution whose total variation distance from an RBM with parameters  $\theta$  is at most  $\frac{1}{12}$ .*

Here, an *efficiently evaluable representation* of a distribution  $q$  is defined as a Boolean function

$$f : \{0, 1\}^N \rightarrow \{0, 1\}^M \quad (1)$$

with the following two properties. First,  $f(\mathbf{B}) \sim q$  if  $\mathbf{B}$  is a random vector of uniformly random bits. Second,  $N$  and the function's computational complexity are bounded by a polynomial in  $M$ .

One might hope that having access to samples from a similar distribution would help to efficiently simulate an RBM. The following lemma shows that additional samples quickly become unhelpful as the Kullback-Leibler divergence between the two distributions increases.

**Lemma 1.** *Consider an algorithm which receives a description of an arbitrary probability distribution  $q$  as input and is also given access to an unlimited number of i.i.d. random variables  $\mathbf{Z}_n \sim p$ . It outputs  $\mathbf{Z} \sim \tilde{q}$  such that its distribution is approximately  $q$  in the sense that  $D_{\text{TV}}[\tilde{q}, q] \leq 1/12$ . If  $RP \neq NP$ , then there is no such algorithm whose time complexity is polynomial in  $D_{\text{KL}}[q \| p]$ .*

*Proof.* Let  $\mathbf{z} \in \{0, 1\}^M$  be a binary vector and let

$$q(\mathbf{z}) = \frac{1}{Z} \sum_{\mathbf{h} \in \{0, 1\}^M} \exp(\mathbf{a}^\top \mathbf{z} + \mathbf{h}^\top \mathbf{A} \mathbf{z} + \mathbf{b}^\top \mathbf{h}) \quad (2)$$

be the probability distribution of an RBM with normalization constant  $Z$  and parameters  $\mathbf{a}, \mathbf{b} \in \mathbb{R}^M$  and  $\mathbf{A} \in \mathbb{R}^{M \times M}$ . Further, let  $p(\mathbf{z}) = 2^{-M}$  be the uniform distribution. Then

$$D_{\text{KL}}[q \| p] = \sum_{\mathbf{z} \in \{0, 1\}^M} q(\mathbf{z}) \log_2 \frac{q(\mathbf{z})}{2^{-M}} = M - H[q] \leq M. \quad (3)$$

If there is an algorithm which generates an approximate sample from an RBM's distribution  $q$  in a number of steps which is polynomial in  $D_{\text{KL}}[q \| p]$ , then its computational complexity is also

bounded by a polynomial in  $M$ . In that time the algorithm can take into account at most  $N$  random variables  $Z_n$  where  $N$  is polynomial in  $M$ , that is,  $N = \psi(M)$  for some polynomial  $\psi$ . Since the input random variables are independent and identical, we can assume without loss of generality that the algorithm simply uses the first  $N$  random variables. The  $N$  random variables correspond to an input of  $M\psi(M)$  uniformly random bits. Note that  $M\psi(M)$  is still polynomial in  $M$ .

However, Theorem 1 states that there is no such polynomial time algorithm if  $RP \neq NP$ .  $\square$

## Appendix C: Generalizations of universal quantization

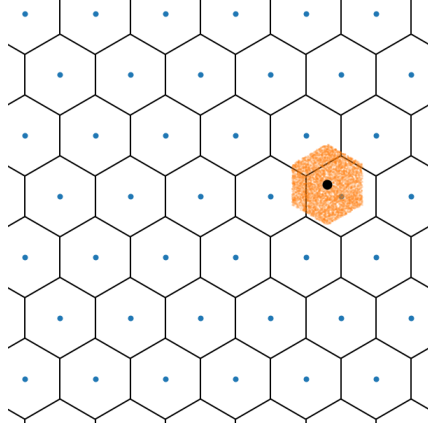

Figure 1: A visualization of an example of the generalized uniform noise channel which can be implemented efficiently. Blue dots represent a lattice and black lines indicate corresponding Voronoi cells. The black dot corresponds to the coefficients  $\mathbf{y}$  and the orange dots are realizations of the random variable  $\mathbf{y} + \mathbf{U}$ .

While the approach discussed in the main text is statistically and computationally efficient, it only allows us to communicate samples from a simple uniform distribution. We briefly discuss two possible avenues for generalizing this approach.

One such generalization to lattice quantizers was already discussed by Ziv [10]. Let  $\Lambda$  be a lattice and  $Q_\Lambda(\mathbf{y})$  be the nearest neighbor of  $\mathbf{y}$  in the lattice. Further let  $\mathcal{V}$  be a Voronoi cell of the lattice and  $\mathbf{U} \sim U(\mathcal{V})$  be a random vector which is uniformly distributed over the Voronoi cell. Then [9, Theorem 4.1.1]

$$Q_\Lambda(\mathbf{y} - \mathbf{U}) + \mathbf{U} \sim \mathbf{y} + \mathbf{U}. \quad (4)$$

An example is visualized in Figure 1. For certain lattices and in high dimensional spaces,  $\mathbf{U}$  will be distributed approximately like a Gaussian [9]. This means universal quantization could be used to approximately simulate an additive white Gaussian noise channel.

Another possibility to obtain Gaussian noise would be the following. Let  $S$  be a positive random variable independent of  $Y$  and  $U \sim U([-0.5, 0.5])$ . We assume that  $S$  like  $U$  is known to both the encoder and the decoder. It follows that

$$(\lfloor y/S - U \rfloor + U) \cdot S \sim y + SU' \quad (5)$$

for another uniform random variable  $U'$ . If  $G \sim \Gamma(3/2, 1/2)$  and  $S = 2\sigma\sqrt{G}$ , then  $SU'$  has a Gaussian distribution with variance  $\sigma^2$  [7]. More generally, this approach allows us to implement any noise which can be represented as a uniform scale mixture. However, the average number of bits required for transmitting  $K = \lfloor y/S - U \rfloor$  can be shown to be (Appendix B)

$$H[K | U, S] = I[Y, (Z, S)] \geq I[Y, Z], \quad (6)$$

where  $Z = Y + SU'$ . This means we require more bits than we would like to if all we want to transmit is  $Z$ . However, if we consider  $(Z, S)$  to be the message, then again we are using only as many bits as we transmit information.

## Appendix D: Differentiability of soft-rounding

For  $\alpha > 0$ , we defined a soft rounding function as

$$s_\alpha(y) = \lfloor y \rfloor + \frac{1}{2} \frac{\tanh(\alpha r)}{\tanh(\alpha/2)} + \frac{1}{2}, \quad \text{where } r = y - \lfloor y \rfloor - \frac{1}{2}. \quad (7)$$

The soft-rounding function is differentiable everywhere. First, we show that the derivative exists at 0. The right derivative of  $s_\alpha$  at 0 exists and is given by

$$\lim_{\varepsilon \downarrow 0} \frac{s_\alpha(\varepsilon) - s_\alpha(0)}{\varepsilon} = \lim_{\varepsilon \downarrow 0} \frac{1}{\varepsilon} \left( \lfloor \varepsilon \rfloor - \frac{1}{2} \frac{\tanh(\alpha(\varepsilon - \lfloor \varepsilon \rfloor - \frac{1}{2}))}{\tanh(\alpha/2)} - \frac{1}{2} \frac{\tanh(-\alpha/2)}{\tanh(\alpha/2)} \right) \quad (8)$$

$$= \lim_{\varepsilon \downarrow 0} \frac{1}{\varepsilon} \left( \frac{1}{2} \frac{\tanh(\alpha(\varepsilon - \frac{1}{2}))}{\tanh(\alpha/2)} - \frac{1}{2} \frac{\tanh(-\alpha/2)}{\tanh(\alpha/2)} \right) \quad (9)$$

$$= \lim_{\varepsilon \downarrow 0} \frac{\tanh(\alpha(\varepsilon - \frac{1}{2})) - \tanh(-\alpha/2)}{2\varepsilon \tanh(\alpha/2)} \quad (10)$$

$$= \frac{1}{2 \tanh(\alpha/2)} \lim_{\varepsilon \downarrow 0} \frac{\tanh(\alpha\varepsilon - \alpha/2) - \tanh(-\alpha/2)}{\varepsilon} \quad (11)$$

$$= \frac{1}{2 \tanh(\alpha/2)} \frac{\partial}{\partial x} \tanh(\alpha x - \alpha/2) \Big|_{x=0} \quad (12)$$

$$= \frac{\alpha \tanh'(-\alpha/2)}{2 \tanh(\alpha/2)}. \quad (13)$$

Similarly, the left derivative at 0 exists and is given by

$$\lim_{\varepsilon \uparrow 0} \frac{s_\alpha(\varepsilon) - s_\alpha(0)}{\varepsilon} = \lim_{\varepsilon \uparrow 0} \frac{1}{\varepsilon} \left( \lfloor \varepsilon \rfloor + \frac{1}{2} \frac{\tanh(\alpha(\varepsilon - \lfloor \varepsilon \rfloor - \frac{1}{2}))}{\tanh(\alpha/2)} - \frac{1}{2} \frac{\tanh(-\alpha/2)}{\tanh(\alpha/2)} \right) \quad (14)$$

$$= \lim_{\varepsilon \uparrow 0} \frac{1}{\varepsilon} \left( -1 + \frac{1}{2} \frac{\tanh(\alpha(\varepsilon + \frac{1}{2}))}{\tanh(\alpha/2)} - \frac{1}{2} \frac{\tanh(-\alpha/2)}{\tanh(\alpha/2)} \right) \quad (15)$$

$$= \lim_{\varepsilon \uparrow 0} \frac{-2 \tanh(\alpha/2) + \tanh(\alpha(\varepsilon + \frac{1}{2})) + \tanh(\alpha/2)}{2\varepsilon \tanh(\alpha/2)} \quad (16)$$

$$= \frac{1}{2 \tanh(\alpha/2)} \lim_{\varepsilon \uparrow 0} \frac{\tanh(\alpha\varepsilon - \alpha/2) - \tanh(\alpha/2)}{\varepsilon} \quad (17)$$

$$= \frac{\alpha \tanh'(-\alpha/2)}{2 \tanh(\alpha/2)}. \quad (18)$$

Since the left and right derivatives are equal,  $s_\alpha$  is differentiable at 0. Since  $s_\alpha(y+1) = s_\alpha(y) + 1$ , the derivative also exists for other integers and it is easy to see that  $s_\alpha$  is differentiable for  $y \notin \mathbb{Z}$ . Hence,  $s_\alpha$  is differentiable everywhere.

## Appendix E: Adapting density models

For the rate term we need to model the density of  $f(\mathbf{x}) + U$ . When  $\mathbf{y} = f(\mathbf{x})$  is assumed to have independent components, we only need to model individual components  $Y + U$ . Following Ballé et al. [2], we parameterize the model through the cumulative distribution  $c_Y$  of  $Y$ , as we have

$$p_{Y+U}(y) = c_Y(y + 0.5) - c_Y(y - 0.5). \quad (19)$$

We can generalize this to model the density of  $s(Y) + U$ , where  $s: \mathbb{R} \rightarrow \mathbb{R}$  is an invertible function. Since  $c_{s(Y)} = c_Y(s^{-1}(y))$ , we have

$$p_{s(Y)+U}(y) = c_Y(s^{-1}(y) + 0.5) - c_Y(s^{-1}(y) - 0.5). \quad (20)$$

This means we can easily adjust a model for the density of  $f(\mathbf{X})$  to model the density of  $s_\alpha(f(\mathbf{X})) + U$ . In addition to being a suitable density, creating an explicit dependency on  $\alpha$  has the added advantage of automatically adapting the density if we choose to change  $\alpha$  during training.

## Appendix F: Additional experimental results

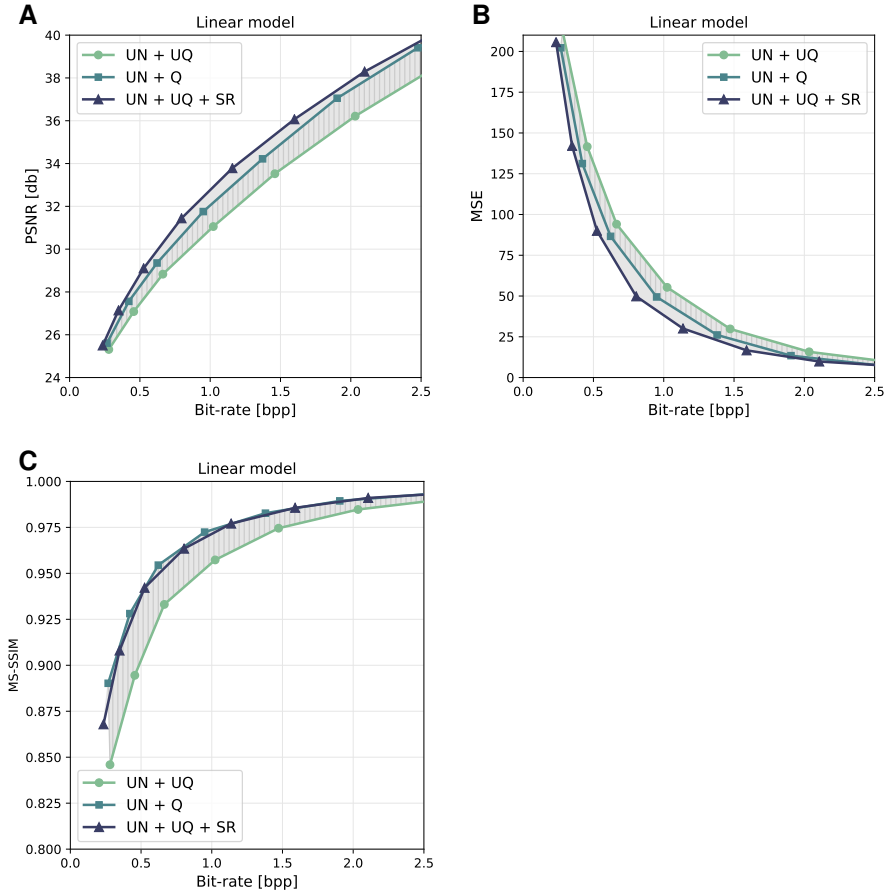

Figure 2: Additional results for the linear model evaluated on the Kodak dataset [1]. **A**: The linear model as described in the main text but instead of a random orthogonal initialization, the linear transforms are initialized to the ones used by JPEG/JFIF [5]. That is, a YCC color transformation followed by a DCT for the encoder and corresponding inverses for the decoder. **B**: The linear model orthogonally initialized as in the main text but evaluated in terms of MSE instead of PSNR. **C**: The same linear model (orthogonally initialized, trained with respect to MSE) evaluated in terms of MS-SSIM.

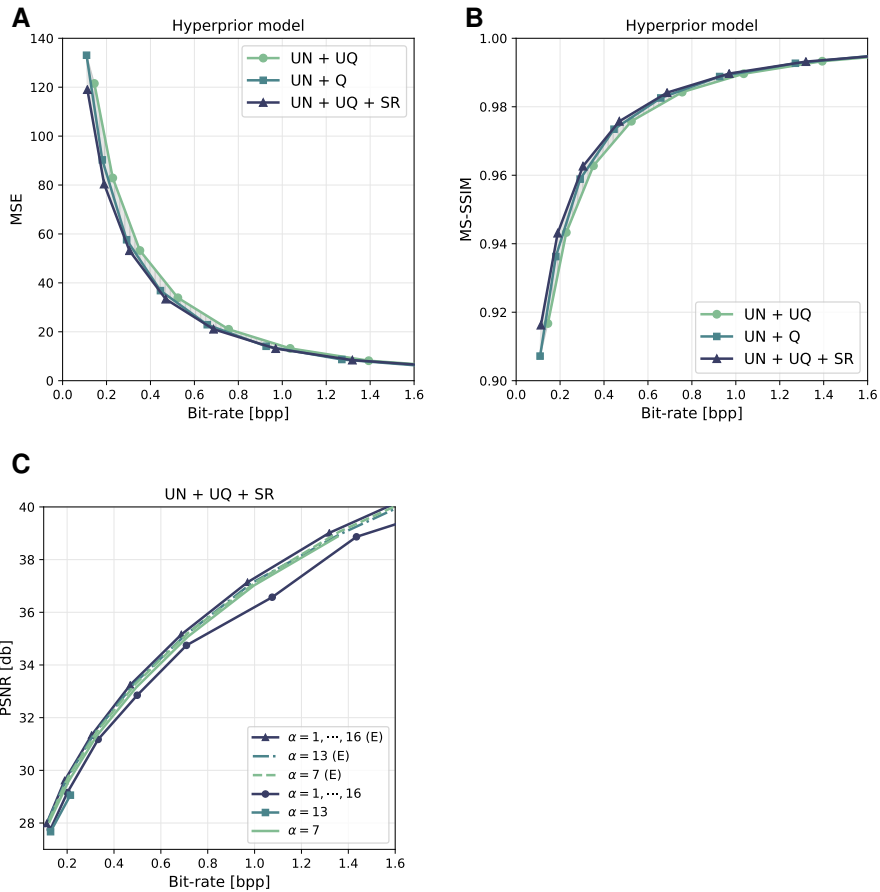

Figure 3: Additional results for the hyperprior model evaluated on the Kodak dataset [1]. **A**: The hyperprior model from the main text but evaluated in terms of MSE instead of PSNR. **B**: The same model evaluated in terms of MS-SSIM. **C**: The effect of expected gradients shown for the full bitrate range.

## Appendix G: Qualitative results

Below we include reconstructions of images from the Kodak dataset [1] for the three approaches **UN + UQ**, **UN + Q**, and **UN + UQ + SR** trained with the same trade-off parameter  $\lambda$ . We chose a low bit-rate to make the differences more easily visible.

For the linear model (Figures 4-6), reconstructions using **UN + Q** and **UN + UQ + SR** have visible blocking artefacts as would be expected given their similarity to JPEG/JFIF [5]. **UN + UQ** masks the blocking artefacts almost completely at the expense of introducing grain.

For the hyperprior model (Figures 7-9), we noticed a tendency of **UN + Q** to produce grid artefacts which we did not observe using **UN + UQ + SR**.

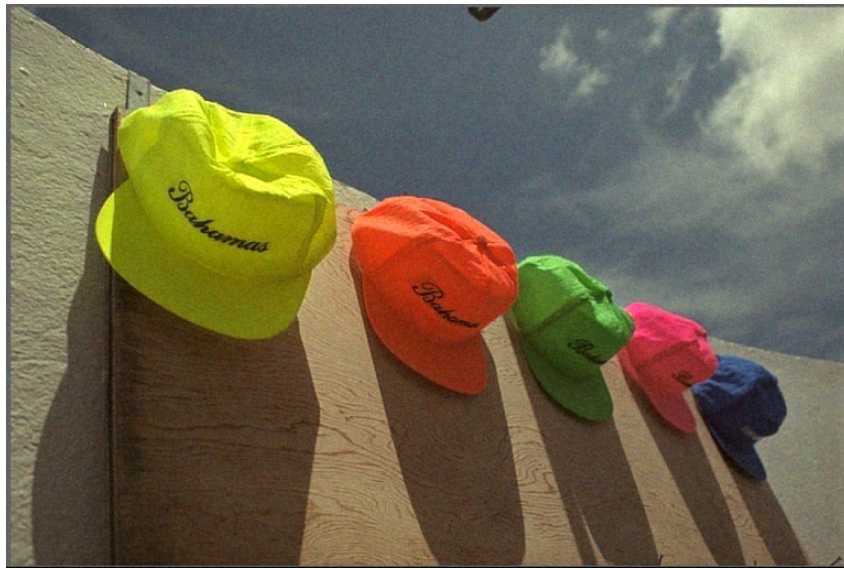

**UN + UQ**, bpp: 0.762 (113%), PSNR: 32.79

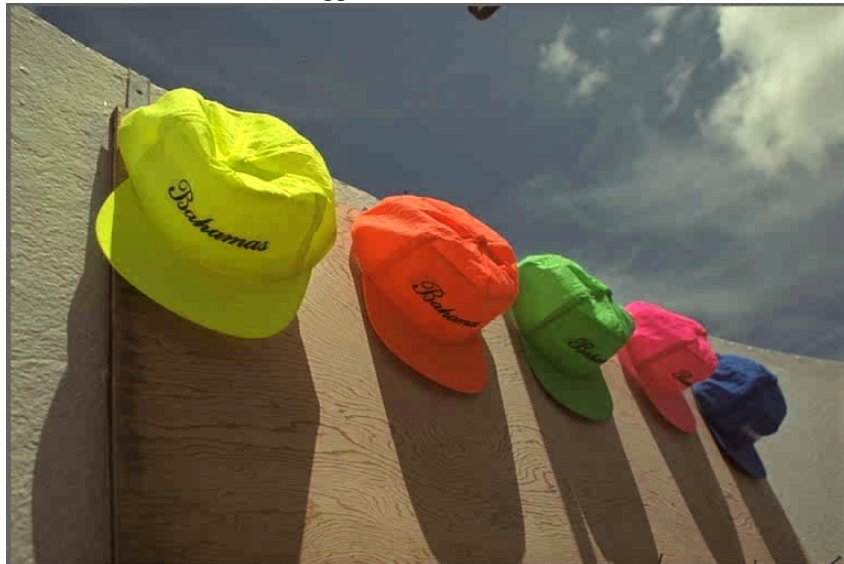

**UN + Q**, bpp: 0.672 (100%), PSNR: 34.33

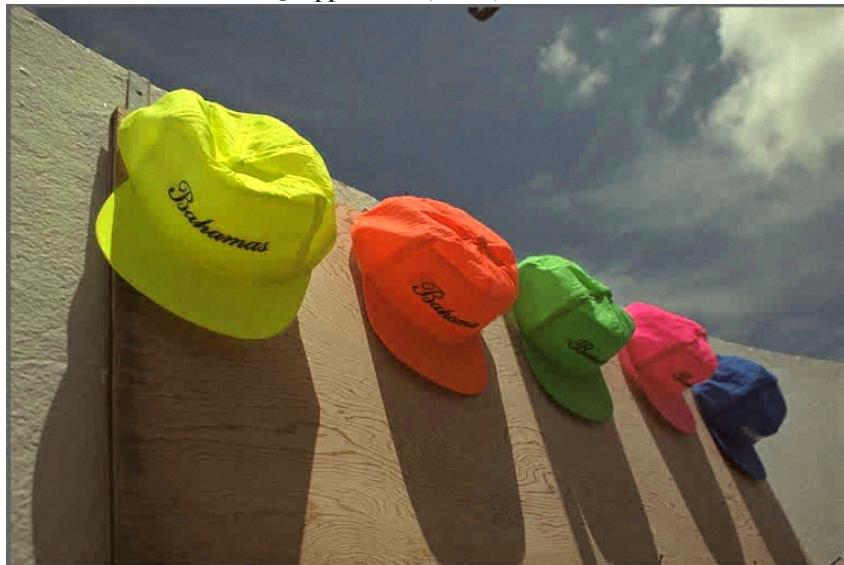

**UN + UQ + SR**, bpp: 0.562 (83%), PSNR: 33.60

Figure 4: Linear model, kodim03

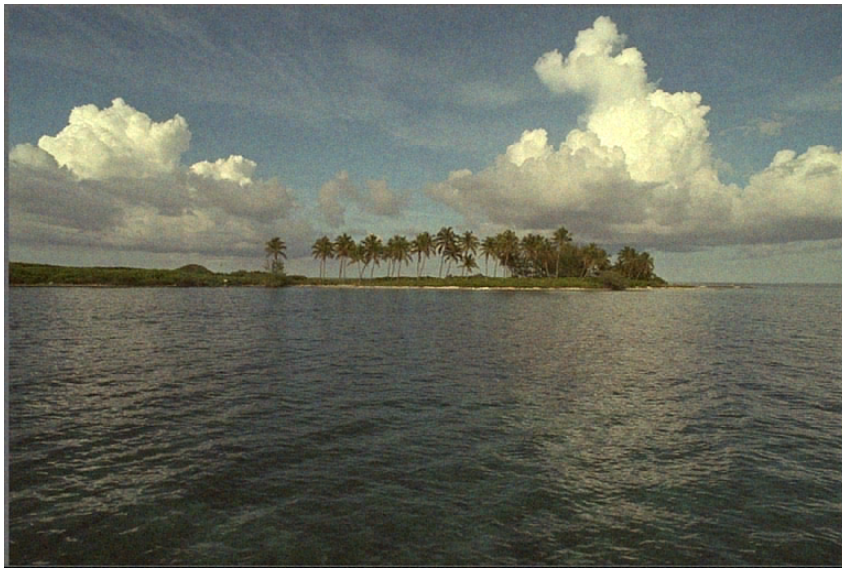

**UN + UQ**, bpp: 0.836 (111%), PSNR: 32.22

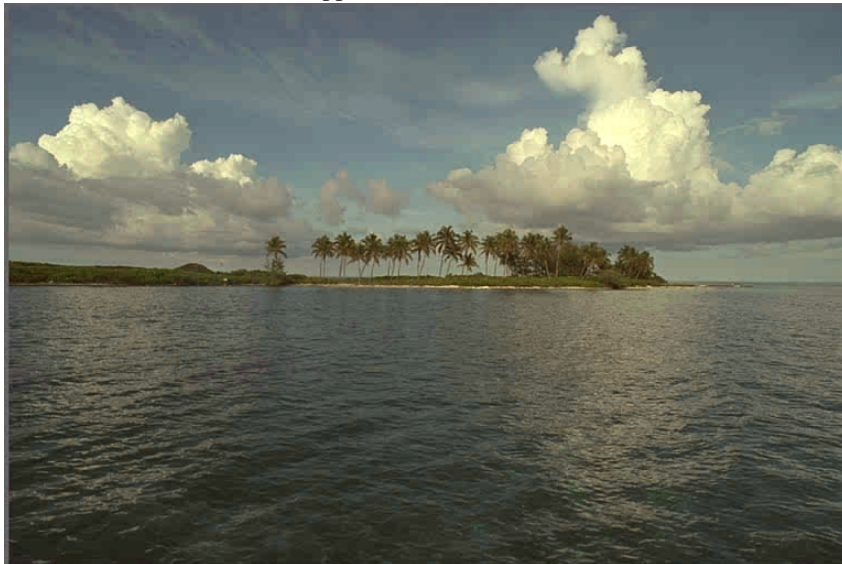

**UN + Q**, bpp: 0.750 (100%), PSNR: 33.09

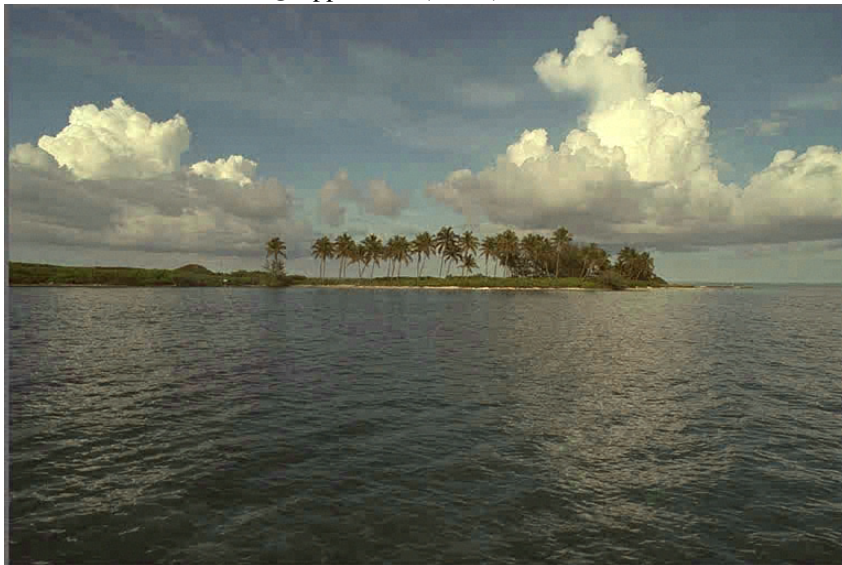

**UN + UQ + SR**, bpp: 0.623 (83%), PSNR: 32.54

Figure 5: Linear model, kodim16

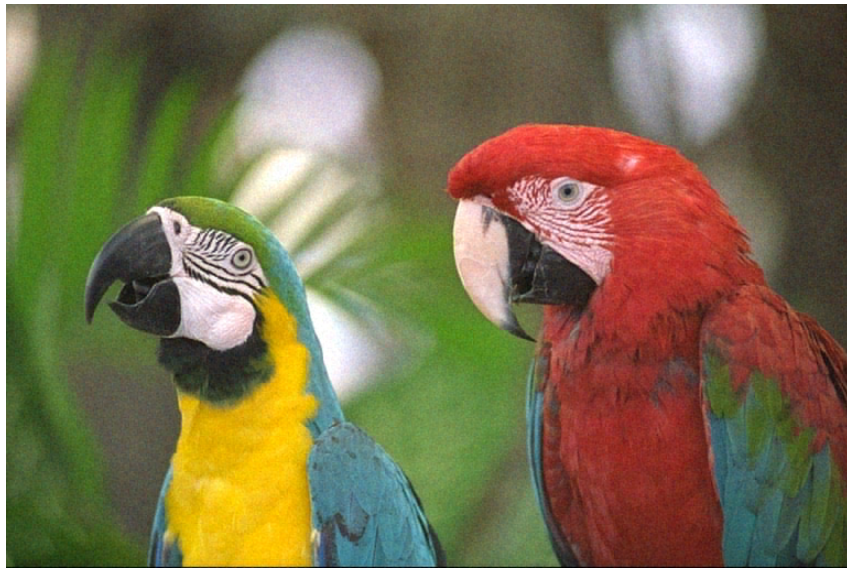

**UN + UQ**, bpp: 0.778 (115%), PSNR: 33.05

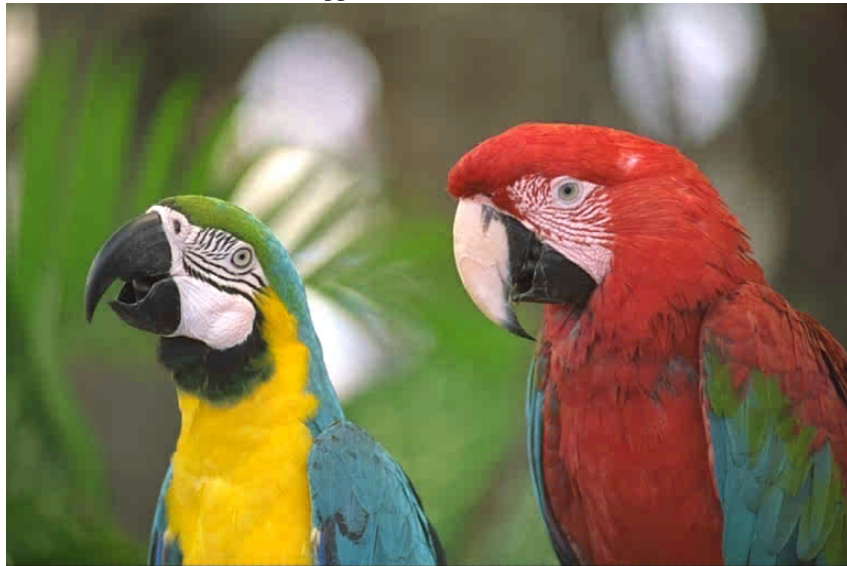

**UN + Q**, bpp: 0.674 (100%), PSNR: 34.71

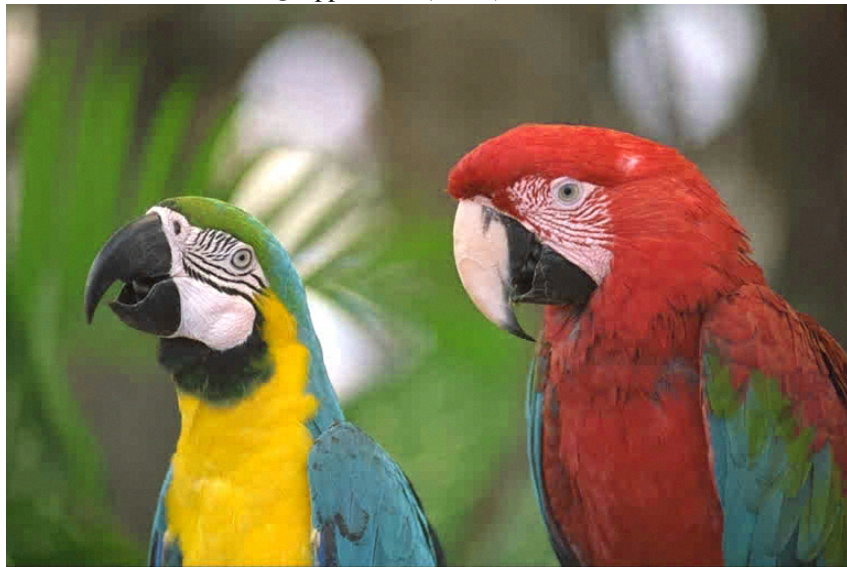

**UN + UQ + SR**, bpp: 0.572 (84%), PSNR: 33.98

Figure 6: Linear model, kodim23



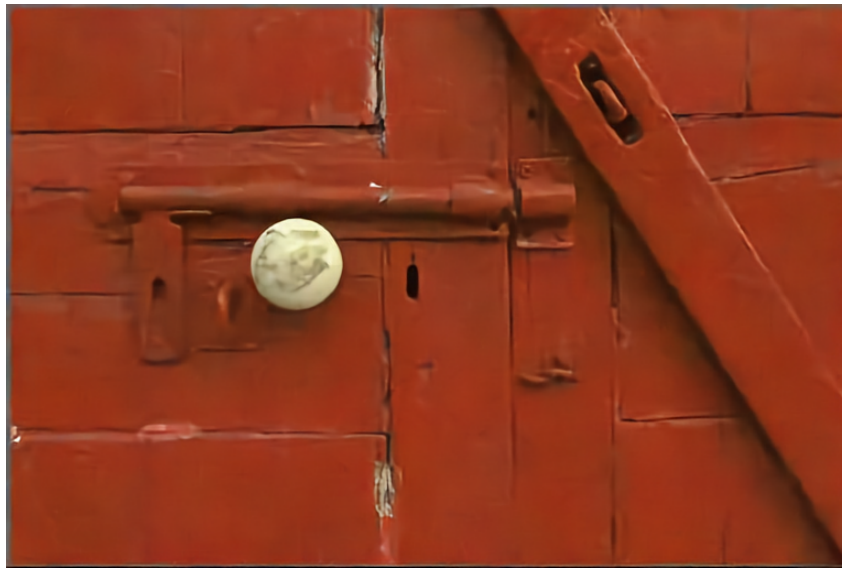

**UN + UQ**, bpp: 0.091 (143%), PSNR: 29.36

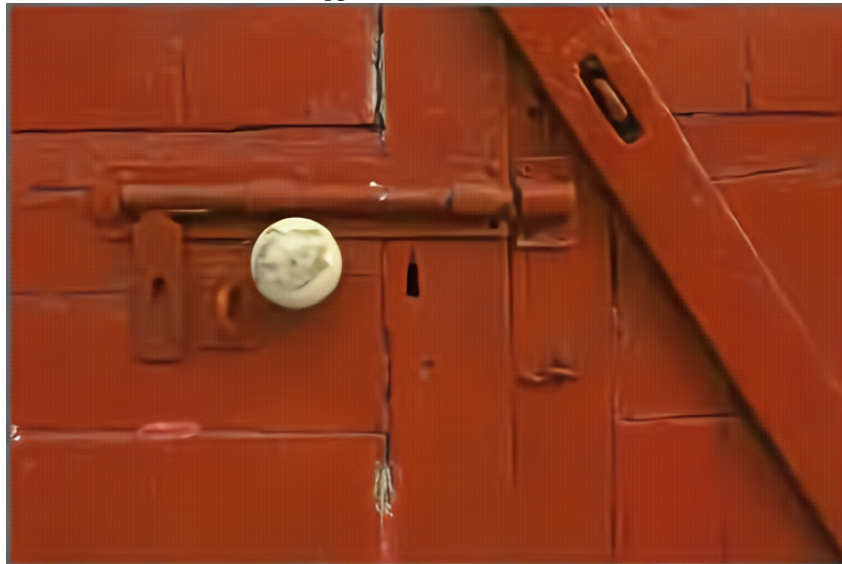

**UN + Q**, bpp: 0.063 (100%), PSNR: 28.78

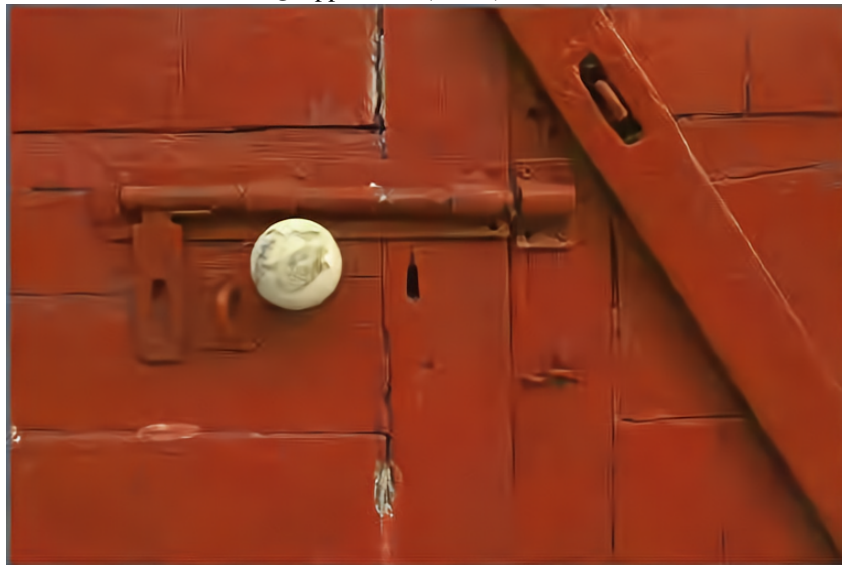

**UN + UQ + SR**, bpp: 0.059 (93%), PSNR: 29.55

Figure 7: Hyperprior model, kodim02

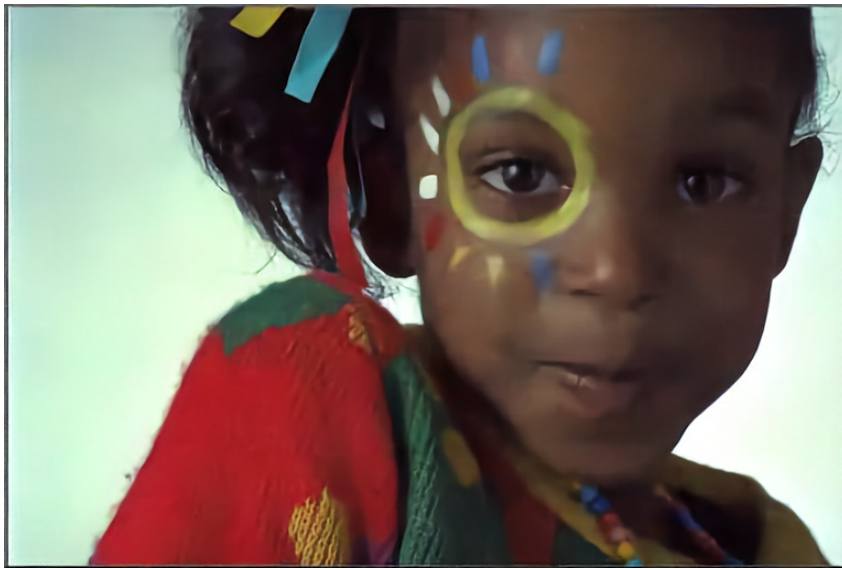

**UN + UQ**, bpp: 0.099 (137%), PSNR: 29.31

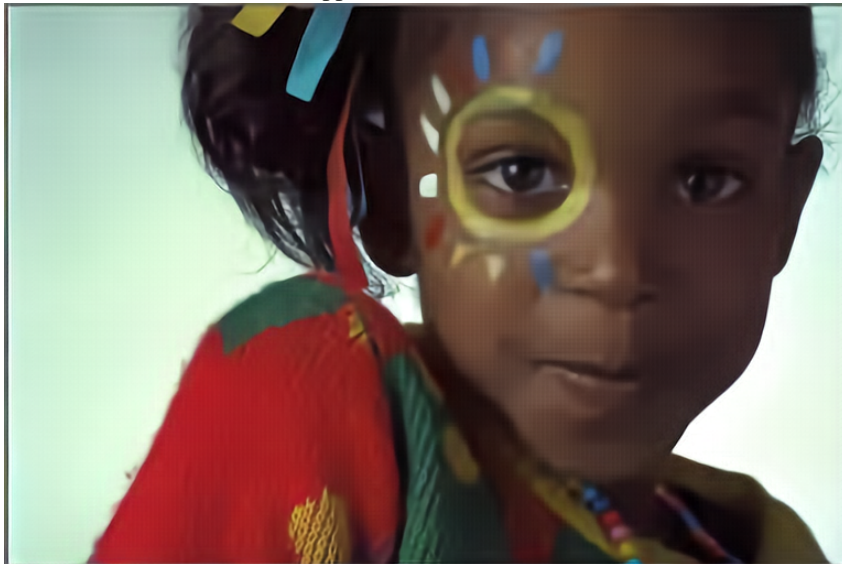

**UN + Q**, bpp: 0.073 (100%), PSNR: 28.82

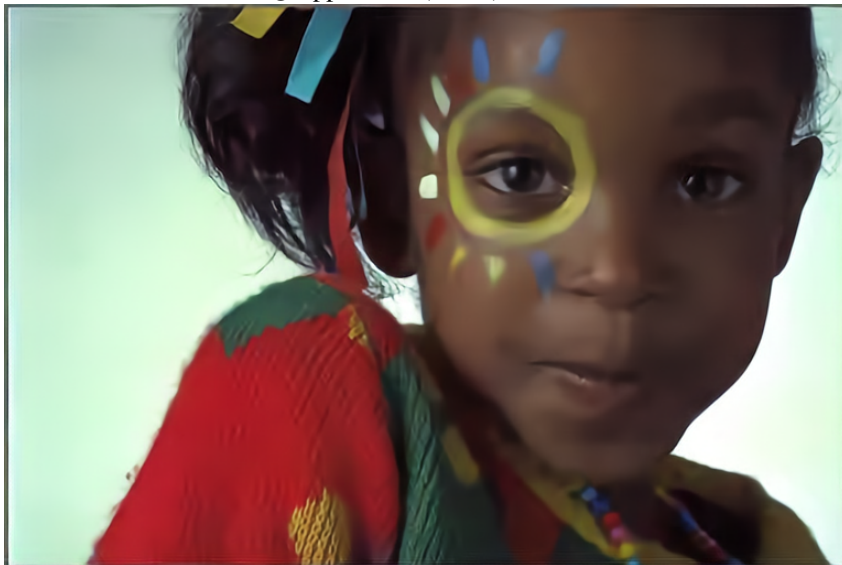

**UN + UQ + SR**, bpp: 0.072 (99%), PSNR: 29.56

Figure 8: Hyperprior model, kodim15

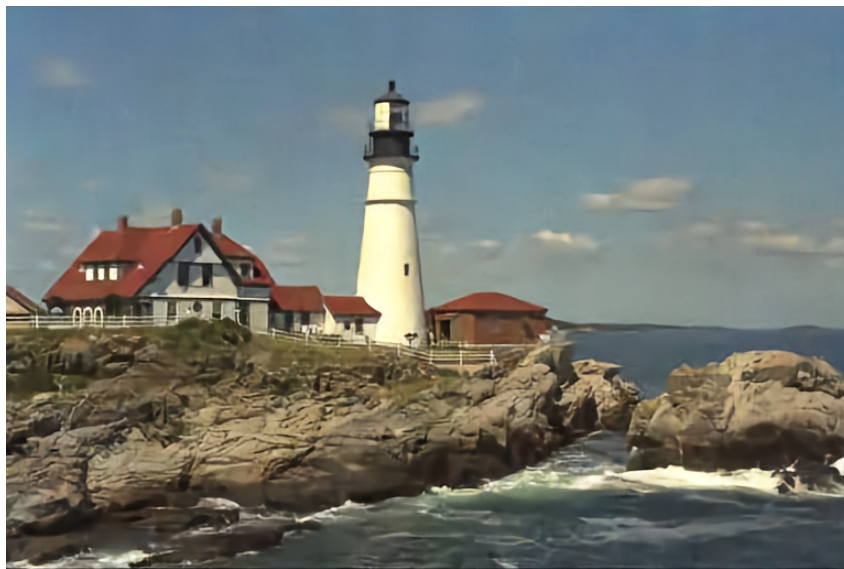

**UN + UQ**, bpp: 0.156 (130%), PSNR: 27.11

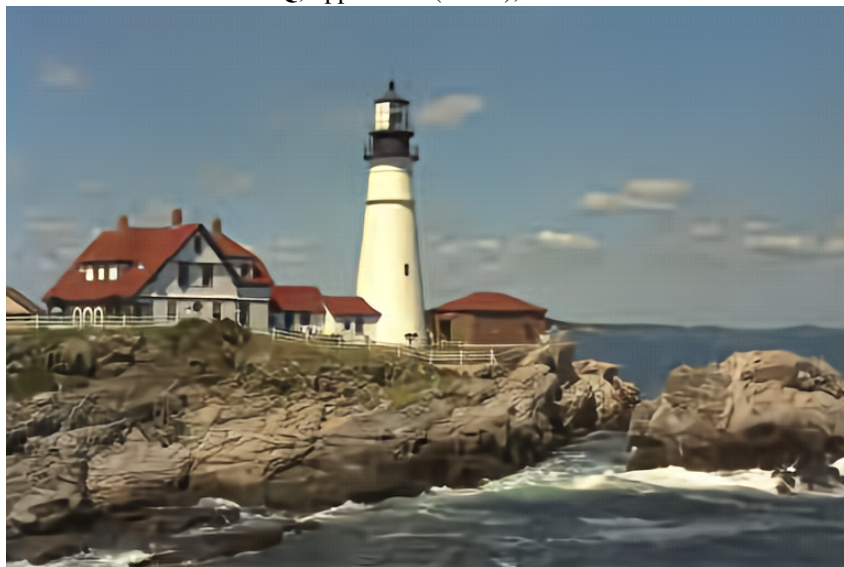

**UN + Q**, bpp: 0.120 (100%), PSNR: 26.75

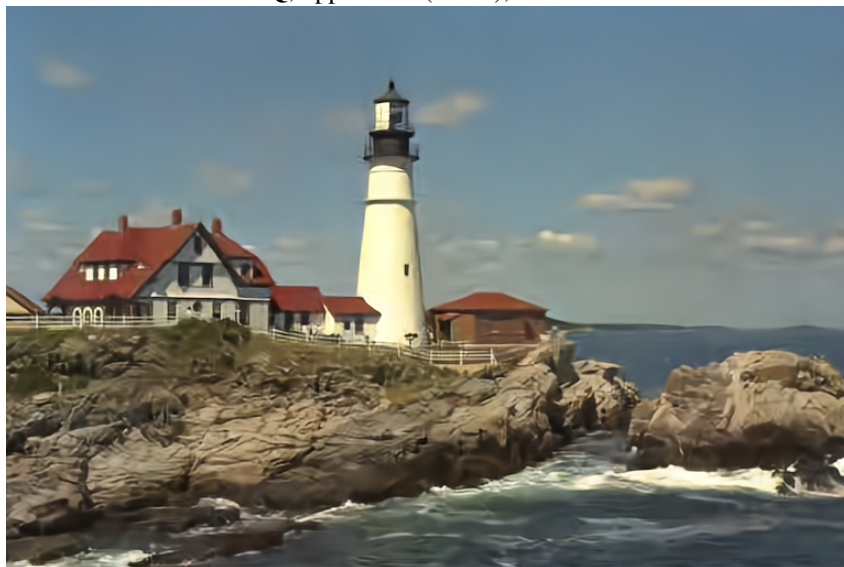

**UN + UQ + SR**, bpp: 0.123 (102%), PSNR: 27.08

Figure 9: Hyperprior model, kodim21

## References

- [1] Kodak PhotoCD dataset. URL <http://r0k.us/graphics/kodak/>.
- [2] Johannes Ballé, David Minnen, Saurabh Singh, Sung Jin Hwang, and Nick Johnston. Variational Image Compression with a Scale Hyperprior. *ICLR*, 2018.
- [3] P. Cuff. Communication requirements for generating correlated random variables. In *2008 IEEE International Symposium on Information Theory*, pages 1393–1397, 2008.
- [4] M. Havasi, R. Peharz, and J. M. Hernández-Lobato. Minimal Random Code Learning: Getting Bits Back from Compressed Model Parameters. In *International Conference on Learning Representations*, 2019.
- [5] ITU-T. Recommendation ITU-T T.81: Information technology – Digital compression and coding of continuous-tone still images – Requirements and guidelines, 1992.
- [6] P. M. Long and R. A. Servedio. Restricted Boltzmann Machines are Hard to Approximately Evaluate or Simulate. In *Proceedings of the 27th International Conference on Machine Learning*, 2010.
- [7] Z. Qin, P. Damien, and S. Walker. Uniform Scale Mixture Models With Applications to Bayesian Inference. In *AIP Conference Proceedings*, 2003.
- [8] P. Smolensky. Information processing in dynamical systems: Foundations of harmony theory. In *Parallel Distributed Processing*, volume 1, page 194–281. MIT Press, 1987.
- [9] R. Zamir. *Lattice Coding for Signals and Networks*. Cambridge University Press, 2014.
- [10] J. Ziv. On universal quantization. *IEEE Transactions on Information Theory*, 31(3):344–347, 1985.
